# Supplementary material
Source: HighWire-hosted journal article supplement (https://www.cmajopen.ca/highwire/filestream/90839/field_highwire_adjunct_files/1/open-2023-0044-original-submission.pdf)

# Trends in hospital coding for people experiencing homelessness, 2015-2020, Canada: a descriptive study

Authors: Eric De Prophetis<sup>1</sup>, MSc; Kinsey Beck<sup>1</sup>, MPH; Diana Ridgeway<sup>1</sup>, PhD; Junior Chuang<sup>1</sup>, MSc; Lucie Richard<sup>2</sup>, MA; Anna Durbin<sup>2</sup>, PhD; Maegan Mazereeuw<sup>1</sup>, MPH, Geoff Hynes<sup>1</sup>; Keith Denny<sup>1</sup>, PhD.

## Affiliations:

<sup>1</sup> Canadian Institute for Health Information, Ottawa, ON, Canada

<sup>2</sup> MAP Centre for Urban Health Solutions, Unity Health Toronto, Toronto, ON, Canada

## Corresponding Author:

Eric De Prophetis  
[edeprophetis@cihi.ca](mailto:edeprophetis@cihi.ca)

## Funding

This project was supported and funded by the Canadian Institute for Health Information.

## Conflict of Interest

The authors have no competing interests to declare.

## Abstract

**Background:** People who experience homelessness (PEH) have elevated needs for health services due to higher rates of chronic disease, mental illness, and substance use disorders. In April 2018, the Canadian Institute for Health Information updated the Canadian Coding Standards to mandate the collection of the ICD-10-CA code Z59.0 Homelessness when noted on a patient record. This study described volumes of Z59.0 in Canada from the fiscal years 2015/16 to 2020/21 and examined the change in rates of Z59.0 before and after the 2018 coding mandate.

**Methods:** We described six fiscal years (2015/16 to 2020/21) of hospital administrative data from the Hospital Morbidity Database. Frequencies and proportions of hospitalizations with a Z59.0 diagnostic code were calculated while results were disaggregated by several types of Canadian geographies. Logistic regression models quantified the odds of Z59.0 coding during hospital stays. Interactions with time (by quarter) were included to assess potential seasonality.

**Results:** The frequency and proportion of PEH in hospitalization records across Canada increased 4.1 times from 6,934 (0.12%) in 2015/16 to 21,529 (0.41%) in 2020/21. Trends varied by province and territory. Adjusted logistic regression models displayed significant increases in recording of the Z59.0 code immediately following the mandate (AOR 1.58, 95% CI 1.52 – 1.65) relative to the pre-mandate period.

**Interpretation:** The 2018 coding mandate likely improved capture of homelessness in health care administrative data. However, these trends varied by province and territory. Future validation studies are warranted to understand utility of this code for research and health system planning.

## Introduction

Homelessness is a persistent challenge faced by Canada's healthcare and social systems. (1–3) In recent years, there have been increasing numbers and diversity of people experiencing homelessness (PEH) (4, 5) and a growing body of evidence now recognizes that homelessness also exists in small towns and rural communities, where it is often less visible and fewer formal services or infrastructure are available to support PEH. (6, 7)

PEH have an elevated need for health services due to high rates of chronic disease, comorbidity, substance use, and mental illness largely driven and exacerbated by poor living conditions. (8–10) These living conditions also contribute to increased vulnerability to infectious diseases such as influenza, tuberculosis, and COVID-19. (11) Consequently, PEH have comparatively high rates of emergency department (ED) visits and hospitalizations, particularly among chronically homeless individuals. (12–14, 11) Yet, because of unique challenges in engaging PEH in research (15) and the limited nature of point-in-time counts (16, 17), it is difficult to evaluate interventions aimed at improving health outcomes and access to quality care for PEH. Data collected routinely during health care ('health administrative data') could help fill some of this data gap as this data is readily available, cost-effective, protected through existing policies and procedures, and can be linked and monitored over time. (18)

The *International Statistical Classification of Diseases and Related Health Problems, 10th Revision, Canada* (ICD-10-CA), originally developed by WHO and adapted the Canadian Institute for Health Information (CIHI), is the Canadian standard for systematic recording, reporting, analysis, interpretation, and comparison of diagnoses and conditions that represent risk factors to health, such as occupational and environmental factors, and lifestyle and psychosocial circumstances. (19) CIHI, in consultation with the provinces and territories (PTs), maintains the Canadian Coding Standards (CCS) and they are regularly revised to keep pace with changing health care models, advancements in health care and technology, and health care information needs. (19) The ICD-10-CA codes Z55.0–65.0 capture the social determinants of health, with the code Z59.0 capturing homelessness status. To improve data capture of this population, it became mandatory in 2018 to record Z59.0 when noted on routine review of the patient record. (19) This directive has the potential to increase the consistency of PEH identification in hospital data, which can in turn be used to improve our understanding of how PEH interact with health care services and allow for the evaluation of policies and programs aimed at improving the health of and care for PEH.

The overall objective of this study is to describe the use of hospital diagnosis codes for homelessness in Canada from the fiscal years (FYs) 2015/16 to 2020/21. Specifically, at the national level, across PTs, and across types of census subdivisions, we will describe volumes of Z59.0 coding over time and examine the change in rates of hospital diagnosis codes for homelessness before and after the 2018 coding mandate change.

## Methods

### *Data sources*

1  
2  
3 This analysis included six FYs (2015/16 to 2020/21) of hospitalization data from the Hospital  
4 Morbidity Database (HMDB). The HMDB captures pan-Canadian administrative, clinical, and  
5 demographic information on hospital discharges from acute care facilities. Inpatient and day  
6 surgery data from Quebec is submitted directly to the Canadian Institute for Health Information  
7 (CIHI) by the Ministère de la Santé et des Services sociaux du Québec. This data is appended  
8 to CIHI's Discharge Abstract Database (DAD) to create the HMDB.  
9  
10

11 For the HMDB, the unit of analysis was unique episodes of care, which refers to all contiguous  
12 acute inpatient hospitalizations and day procedure visits. (20) This eliminates the risk of double  
13 counting that may occur due to a patient transfer. Hospital records without a valid health card  
14 number in addition to missing admission date/times or discharge date/times were excluded as  
15 their episode sequence is not traceable. For the entire observation period, 3,068 (3.3%) out of  
16 92,922 Z59.0 coded records were not traceable (Figure 1).  
17  
18

### 19 *Definitions*

20  
21 Patients were classified as "homeless" if the ICD-10-CA code Z59.0 was recorded anywhere in  
22 the list of diagnostic codes attached to their record. The CCS manual cites a definition from the  
23 Canadian Observatory on Homelessness: "homelessness encompasses a range of physical  
24 living situations," including living on the streets or in places not intended for human habitation  
25 (e.g., sidewalks, parks, cars); staying in overnight shelters; and staying in temporary  
26 accommodations (e.g., motels, rooming houses, with friends/family, couch surfing, temporary  
27 housing for immigrants and refugees during settlement) (19, 21).  
28  
29

30  
31 Three distinct time periods were identified that have perceived relevance for coding of Z59.0 are  
32 as follows: 1) *pre mandate* (FYs 2015/16 to 2017/18), 2) *post mandate* (FYs 2018/19 to  
33 2019/20), and 3) *pandemic* (FY 2020/21). Note that as these periods are assigned by FYs, the  
34 first day of the 2020/21 FY begins on April 1<sup>st</sup>, 2020, and closely aligned to the start of the  
35 COVID-19 related public health measures in Canada. The separation of the pandemic period  
36 from the post mandate period was done to discern any potential impact confounding the  
37 relationship between the 2018 coding mandate and hospital coding practices for homelessness.  
38  
39

40 In addition, we examined coding patterns by fiscal quarter or three-month period, which closely  
41 resembles the division of seasons. The fiscal quarters are numbered 1 through 4, with quarter 1  
42 (Q1) from April to June of the FY, quarter 2 (Q2) from July to September, quarter 3 (Q3) from  
43 October to December, and quarter 4 (Q4) from January to March of the following calendar year.  
44  
45

### 46 *Analysis*

47  
48 Annual frequencies and proportions of total hospitalizations with a Z59.0 diagnostic code were  
49 calculated for FYs 2015/16 to 2020/21. Results were disaggregated by PTs, and groups of  
50 census subdivisions including major census metropolitan areas (CMA) (Toronto, Montreal, and  
51 Vancouver), all other CMAs, Census Agglomerations (CAs), as well as rural areas (non-CMA or  
52 CAs).  
53

54  
55 Logistic regression models were used to quantify the odds of PEH identification among hospital  
56 stays based on the three distinct time periods mentioned above. Logistic models with different  
57  
58

1  
2  
3 time definitions for the interactions were tried, with the final model selected measuring the effect  
4 of the period and adjusting for fiscal quarter, coded numerically as 1 to 24 to indicate each fiscal  
5 quarter of the observation period, and the interaction between fiscal quarter and period to  
6 assess for potential seasonality effects. In addition, the final model included PT to quantify  
7 within-jurisdiction effects and any variation between PTs. All statistical analyses were performed  
8 using SAS version 9.4.  
9  
10

### 11 *Ethics statement*

12  
13 CIHI is an independent not-for-profit organization that has been established to collect and report  
14 on health outcomes across Canada. CIHI is a prescribed entity under section 45 (1) of Ontario's  
15 personal Health Information Protection Act, allowing CIHI to hold personal health information for  
16 the purposes of compiling statistical information for the management of the health system. (22)  
17 As this study used routinely collected data that was analyzed at CIHI, in accordance with their  
18 institutional privacy policies, it was exempted from research ethics approval.  
19  
20

## 21 **Results**

### 22 *Inpatient stays*

23  
24 Across all years under the observation period, 85,607 (0.24%) hospitalizations out of  
25 35,750,684 total hospitalizations were assigned a Z59.0 diagnosis code. The frequency and  
26 proportion of PEH in hospitalization records across Canada increased from 6,934 (0.12%) in  
27 2015/16 to 21,529 (0.41%) in 2020/21 (Table 1 and Figure 2). The largest annual increase of  
28 54.2% occurred between 2017/18 and 2018/19.  
29  
30  
31

### 32 *Provincial/Territorial Results*

33  
34 In 2020/21, facilities from 4 provinces accounted for 87% of recorded hospitalizations for PEH:  
35 Ontario (23%, n=4,993), British Columbia (31%, n=6,679), Alberta (21%, n=4,540) and Quebec  
36 (12%, n=2,546). From 2018/19 onward, the combined Territories had the largest proportions of  
37 hospitalizations attributable to PEH, which in 2020/21 was 2.2% compared to the smallest  
38 proportion of 0.2% in the combined Atlantic provinces. Although the proportions of  
39 hospitalizations attributable to PEH were relatively high in the Territories, their frequencies  
40 remain small (n=409 for FY 2020/21). Furthermore, there was variation in coding Z59.0 over  
41 time by PT (Figure 3). For example, in Alberta there were increases in the coding of Z59.0  
42 during the FY 2018/19, whereas coding of Z59.0 in British Columbia was proportionately more  
43 consistent throughout the observation period.  
44  
45  
46

### 47 *CMA/CA Results*

48  
49 In the FY 2020/21, facilities in major CMAs (Vancouver, Toronto, and Montreal) and Other  
50 CMAs accounted for the largest proportions of recorded hospitalizations for PEH at 32%  
51 (n=6,828) and 45% (n=9,736), respectively. From 2018/19 to 2020/21, major CMAs exhibited a  
52 decline in the number and proportion of recorded PEH hospitalizations from 38% (n=6,977) to  
53 32% (n=6,828) whereas other CMAs and census agglomerations (CA) exhibited an increase  
54 from 41% (n=7,547) to 45% (n=9,736) and 18% (n=3,264) to 19% (n=4,167), respectively. From  
55  
56  
57  
58  
59  
60

1  
2  
3 2015/16 to 2020/21, less than 5% of all recorded PEH hospitalizations were from facilities in  
4 non-CMA/CA geographic areas (i.e., rural, and remote areas).  
5

### 6 *Effect of the Mandate*

7

8 Logistic regression models showed that during both the post-mandate and pandemic period  
9 there was a significant increase in the probability of PEH being recorded in the hospital setting.  
10 As a graph of trends by fiscal quarters over the observation period indicated potential  
11 seasonality, an interaction was applied between identified periods and fiscal quarters, which  
12 was significant. The odds of PEH identification increased by 60% (AOR 1.59, 95% CI 1.53 –  
13 1.65) immediately following the mandate and the pandemic period increased the odds by 100%  
14 (AOR 2.04, 95% CI 1.93 – 2.16) relative to the pre-mandate period (Table 2).  
15  
16

17 The odds of PEH being recorded in the post mandate period varied between PTs (Figure 5).  
18 The highest adjusted odds ratios (AOR) were in Ontario (AOR 4.29, 95% CI 3.72-4.96), Atlantic  
19 Canada (AOR 3.26, 95% CI 2.51-4.27), and Alberta (AOR 3.07, 95% CI 2.77-3.41).  
20 Interestingly, British Columbia exhibited a reduction in the odds of a PEH being recorded in the  
21 post mandate period (AOR 0.88, 95% CI 0.83-0.92) (Figure 5).  
22  
23

### 24 **Interpretation**

25

26 We examined patterns in coding ICD-10-CA Z59.0 from the 2015/16 through 2020/21 FYs  
27 across hospitals in Canada. There was an 84% increase in the proportion of coding Z59.0  
28 following the 2018 mandate at a national level (volumes increased from 10,014 in 2017 to  
29 18,489 in 2018). Over 20,000 hospitalizations in Canada in the 2020/21 FY included the code  
30 Z59.0. Given this substantial increase, Z59.0 has become a promising identifier that has the  
31 potential to provide a reliable source of information for health system planning and research.  
32  
33

34 There were notable differences in coding Z59.0 across PTs. For example, in British Columbia  
35 there was no discernable increase in coding volumes following the mandate, which suggests  
36 some facilities in BC were already using the code with some regularity before the new coding  
37 direction. There were proportionally more Z59.0 hospitalizations in the Territories, British  
38 Columbia and Manitoba compared to Saskatchewan, Quebec, Ontario, and the Atlantic  
39 provinces in the most recent year. However, it is important to note that the counts for the  
40 territories remain low, despite a large relative increase.  
41  
42  
43

44 Differences could also be related to the number of reporting facilities and the concentration of  
45 urban populations in each PT. As facilities in major urban areas were regularly using the Z59.0  
46 code prior to the mandate, differences between provinces in terms of PEH proportions may be  
47 the result of a less urbanized population as opposed to a substantive difference in coding  
48 practices.  
49  
50

51 There was a significant increase in the odds of coding Z59.0 following the start of the pandemic  
52 in 2020. The increase may be in part due to care for COVID-19 given the heightened infection  
53 and complication rate requiring hospital care of this population. (11, 23–25) Furthermore,  
54 deferring hospital care can be more challenging for PEH as they have more acute needs and  
55 fewer options for care than their housed counterparts. (26) As more data becomes available that  
56  
57  
58  
59  
60

1  
2  
3 covers the pandemic period, more research is needed to understand the societal and  
4 environmental factors that may have contributed to how PEH seek hospital services.  
5

6 Depending on the FY, the highest volumes of admissions for PEH occurred in Q2 or Q3.  
7 Although previous studies on the seasonal patterns of PEH admissions are limited, seasonality  
8 for PEH emergency department (ED) admissions have been observed in Ontario (4) while some  
9 evidence suggests that low-acuity adult patients are more likely to visit the ED during warmer  
10 months (27). More investigation into the seasonal trends of hospitalizations regarding PEH is  
11 warranted as this information can be useful for health system planning. Further analysis into the  
12 seasonal patterns of PEH accessing acute care with data post mandate (2018 onwards) using  
13 time series is required in future studies.  
14  
15

### 16 *Limitations*

17  
18 This analysis only considers PEH who have accessed hospital services and were documented  
19 as homeless on their medical chart by their care provider. Therefore, the ability of this code to  
20 capture the entire population of PEH accessing hospital services (i.e., sensitivity) is unknown. A  
21 validation study looking at hospital administrative data before the 2018 mandate suggests  
22 hospital-based codes have low sensitivity to capture the full population of PEH, in part because  
23 of the lack of healthcare encounters during homeless episodes. (28) PEH can have significant  
24 barriers to accessing hospital care (29) and have also shown to seek care through outpatient  
25 physician clinics more than the general population (28). Furthermore, as we only included  
26 patients with a valid health card and complete admission and discharge information, this may  
27 influence who is captured in the analysis. More research is needed to understand differences in  
28 the characteristics of PEH accessing hospital-based health care vs. the broader population of  
29 PEH.  
30  
31  
32  
33

34 This analysis only addressed PEH who were identified in the HMDB using ICD-10-CA Z59.0.  
35 Data from the Ontario Mental Health Reporting System (OMHRS), which reports on information  
36 submitted to CIHI about all individuals receiving adult inpatient mental health services in  
37 Ontario, was not included in this analysis given the limited use of Z59.0 in the database.  
38 Information on residential status is available in OMHRS, which can be investigated in future  
39 studies.  
40  
41

42 Within or across hospitals, there may not be a systematic method for documenting residential  
43 status as part of the patient intake or assessment process. For example, those who seek shelter  
44 by couch surfing or staying with family and friends may not be considered homeless at the point  
45 of care. (7) Additional ICD-10-CA codes under Z59.X (i.e., Z59.1-Z59.9) capture elements of  
46 residential instability, like inadequate housing, unsuitable living conditions and extreme poverty,  
47 but these are not mandatory to code. Due to this nuance, a large subset of people experiencing  
48 homelessness are likely not captured in hospital administrative data.  
49  
50

### 51 *Conclusion*

52  
53 At the national level, recording of homelessness in health care administrative data increased  
54 following the 2018 coding mandate. This is the first study known to the authors to report levels  
55  
56  
57  
58  
59  
60

1  
2  
3  
4  
5  
6  
7  
8  
9  
10  
11  
12  
13  
14  
15  
16  
17  
18  
19  
20  
21  
22  
23  
24  
25  
26  
27  
28  
29  
30  
31  
32  
33  
34  
35  
36  
37  
38  
39  
40  
41  
42  
43  
44  
45  
46  
47  
48  
49  
50  
51  
52  
53  
54  
55  
56  
57  
58  
59  
60

of homelessness captured in hospital data across Canada. Future research validating the capture of this code is warranted to understand comparability between jurisdictions, generalizability of results and utility of the data for health system improvement and planning.

Confidential



## Literature Cited

1. Ministry of Attorney General. Budget 2022 provides new funding to address homelessness in B.C. BC Gov News 2022 Mar 17 [cited 2022 Nov 22]. Available from: URL: <https://news.gov.bc.ca/26412>.
2. Ministry of Mental Health and Addictions. New housing model supports people with complex challenges. BC Gov News 2022 Jan 20 [cited 2022 Nov 22]. Available from: URL: <https://news.gov.bc.ca/26120>.
3. Government of Manitoba. Manitoba Government announces initiatives to improve community safety and wellness across the province. Manitoba News Release 2022 Oct 31 [cited 2022 Nov 22]. Available from: URL: <https://news.gov.mb.ca/news/index.html?item=56759>.
4. Strobel S, Burcul I, Dai JH, Ma Z, Jamani S, Hossain R. Characterizing people experiencing homelessness and trends in homelessness using population-level emergency department visit data in Ontario, Canada. *Health Reports* 2021; 32(1):13–23. Available from: URL: <https://www150.statcan.gc.ca/n1/pub/82-003-x/2021001/article/00002-eng.htm>.
5. Gaetz S, Dej E, Richter T, Redman M. *The state of homelessness in Canada 2016*. Toronto; 2016 [cited 2022 Jan 4]. Available from: URL: <https://www.homelesshub.ca/SOHC2016>.
6. Buck-McFadyen E. Rural homelessness: how the structural and social context of small-town living influences the experience of homelessness. *Can J Public Health* 2022; 113(3):407–16. Available from: URL: <https://link.springer.com/article/10.17269/s41997-022-00625-9>.
7. Waegemakers Schiff J, Schiff R., Turner A., Bernard K. Rural Homelessness in Canada: Directions for Planning and Research. *The Journal of Rural and COmmunity Development* 2015; 10(4):85–106.
8. Public Health Agency of Canada. Substance-related poisonings and homelessness in Canada: a descriptive analysis of hospitalization data. Ottawa; June 2021. Available from: URL: <https://www.canada.ca/en/health-canada/services/opioids/hospitalizations-substance-related-poisonings-homelessness.html>.
9. Fazel S, Khosla V, Doll H, Geddes J. The prevalence of mental disorders among the homeless in western countries: systematic review and meta-regression analysis. *PLoS Medicine* 2008; 5(12):e225.
10. Aldridge RW, Story A, Hwang SW, Nordentoft M, Luchenski SA, Hartwell G et al. Morbidity and mortality in homeless individuals, prisoners, sex workers, and individuals with substance use disorders in high-income countries: a systematic review and meta-analysis. *The Lancet* 2018; 391(10117):241–50.
11. Baral S, Bond A, Boozary A, Bruketa E, Elmi N, Freiheit D et al. Seeking shelter: homelessness and COVID-19. *FACETS* 2021; 6:925–58. Available from: URL: <https://www.facetsjournal.com/doi/full/10.1139/facets-2021-0004>.
12. Guirguis-Younger M, Hwang SW, McNeil R. *Homelessness & Health in Canada*. University of Ottawa Press / Les Presses de l'Université d'Ottawa; 2014.

13. Chambers C, Chiu S, Katic M, Kiss A, Redelmeier DA, Levinson W et al. High utilizers of emergency health services in a population-based cohort of homeless adults. *American Journal of Public Health* 2013 [cited 2022 Jan 27]; 103 Suppl 2(Suppl 2):S302-10. Available from: URL: <https://pubmed.ncbi.nlm.nih.gov/24148033/>.
14. Miyawaki A, Hasegawa K, Figueroa JF, Tsugawa Y. Hospital Readmission and Emergency Department Revisits of Homeless Patients Treated at Homeless-Serving Hospitals in the USA: Observational Study. *Journal of General Internal Medicine* 2020; 35(9):2560–8. Available from: URL: <https://pubmed.ncbi.nlm.nih.gov/32666492/>.
15. Richards CM, Sharif F, Eischen S, Thomas J, Wang Q, Guo H et al. Retention of Homeless Smokers in the Power to Quit Study. *Nicotine Tob Res* 2015; 17(9):1104–11.
16. Library of Parliament. Defining and Enumerating Homelessness in Canada. Ottawa; 2020 [cited 2022 Jan 4]. Available from: URL: [https://lop.parl.ca/sites/PublicWebsite/default/en\\_CA/ResearchPublications/202041E](https://lop.parl.ca/sites/PublicWebsite/default/en_CA/ResearchPublications/202041E).
17. Williams JC. "Stand Up and Be Counted": The Politics of a Homeless Enumeration. *Poverty & Public Policy* 2011; 3(3):1–27.
18. Booth R, Richard L, Forchuk C, Shariff SZ. Utility, limitations and opportunities for using linked health administrative data to study homelessness in Ontario. *Healthcare Quarterly* 2022; 24(4). Available from: URL: <https://www.longwoods.com/content/26718/healthcare-quarterly/utility-limitations-and-opportunities-for-using-linked-health-administrative-data-to-study-homeless>.
19. Canadian Institute for Health Information. Canadian coding standards for version 2022 ICD-10-CA and CCI. Ottawa, Ontario; 2022. Available from: URL: [https://secure.cihi.ca/free\\_products/canadian-coding-standards-2022-en.pdf](https://secure.cihi.ca/free_products/canadian-coding-standards-2022-en.pdf).
20. Canadian Institute for Health Information. Indicator Library: General Methodology Notes — Clinical Indicators. Ottawa, ON: CIHI; December 2022.
21. Canadian Observatory on Homelessness. Canadian Definition of Homelessness. Toronto: Canadian Observatory on Homelessness Press; 2012 [cited 2022 Jan 4]. Available from: URL: <https://www.homelesshub.ca/resource/canadian-definition-homelessness>.
22. Personal Health Information Protection Act; 2004 [cited 2022 Dec 13]. Available from: URL: <https://www.ontario.ca/laws/statute/04p03#BK61>.
23. Kiran T, Craig-Neil A, Das P, Lockwood J, Wang R, Nathanielsz N et al. Association of Homelessness with COVID-19 Positivity among Individuals Visiting a Testing Centre: A Cross-Sectional Study. *Healthcare Policy* 2022; 17(3):34–41.
24. Perri M, Dosani N, Hwang SW. COVID-19 and people experiencing homelessness: challenges and mitigation strategies. *CMAJ* 2020; 192(26):E716-E719.
25. Richard L, Booth R, Rayner J, Clemens KK, Forchuk C, Shariff SZ. Testing, infection and complication rates of COVID-19 among people with a recent history of homelessness in Ontario, Canada: a retrospective cohort study. *Canadian Medical Association Open Access Journal* 2021; 9(1):E1-E9. Available from: URL: <https://www.cmajopen.ca/content/9/1/E1>.

- 1  
2  
3 26. Liu M, Richard L, Campitelli MA, Nisenbaum R, Dhalla IA, Wadhera RK et al.  
4 Hospitalizations During the COVID-19 Pandemic Among Recently Homeless Individuals: a  
5 Retrospective Population-Based Matched Cohort Study. *Journal of General Internal Medicine*  
6 2022. Available from: URL: <https://pubmed.ncbi.nlm.nih.gov/35396658/>.  
7  
8 27. Otsuki H, Murakami Y, Fujino K, Matsumura K, Eguchi Y. Analysis of seasonal differences  
9 in emergency department attendance in Shiga Prefecture, Japan between 2007 and 2010.  
10 *Acute Med Surg* 2016; 3(2):74–80.  
11  
12 28. Richard L, Hwang SW, Forchuk C, Nisenbaum R, Clemens K, Wiens K et al. Validation  
13 study of health administrative data algorithms to identify individuals experiencing homelessness  
14 and estimate population prevalence of homelessness in Ontario, Canada. *BMJ Open* 2019;  
15 9(10):e030221.  
16  
17 29. Purkey E, MacKenzie M. Experience of healthcare among the homeless and vulnerably  
18 housed a qualitative study: opportunities for equity-oriented health care. *Int J Equity Health*  
19 2019; 18(1):101.  
20  
21  
22  
23  
24  
25  
26  
27  
28  
29  
30  
31  
32  
33  
34  
35  
36  
37  
38  
39  
40  
41  
42  
43  
44  
45  
46  
47  
48  
49  
50  
51  
52  
53  
54  
55  
56  
57  
58  
59  
60

Confidential

**The RECORD statement – checklist of items, extended from the STROBE statement, that should be reported in observational studies using routinely collected health data.**

|                           | Item No. | STROBE items                                                                                                                                                                               | Location in manuscript where items are reported | RECORD items                                                                                                                                                                                                                                                                                                                                                                                                                                | Location in manuscript where items are reported |
|---------------------------|----------|--------------------------------------------------------------------------------------------------------------------------------------------------------------------------------------------|-------------------------------------------------|---------------------------------------------------------------------------------------------------------------------------------------------------------------------------------------------------------------------------------------------------------------------------------------------------------------------------------------------------------------------------------------------------------------------------------------------|-------------------------------------------------|
| <b>Title and abstract</b> |          |                                                                                                                                                                                            |                                                 |                                                                                                                                                                                                                                                                                                                                                                                                                                             |                                                 |
|                           | 1        | (a) Indicate the study’s design with a commonly used term in the title or the abstract (b) Provide in the abstract an informative and balanced summary of what was done and what was found | A) Page 1<br>B) Page 2                          | RECORD 1.1: The type of data used should be specified in the title or abstract. When possible, the name of the databases used should be included.<br><br>RECORD 1.2: If applicable, the geographic region and timeframe within which the study took place should be reported in the title or abstract.<br><br>RECORD 1.3: If linkage between databases was conducted for the study, this should be clearly stated in the title or abstract. | 2                                               |
| <b>Introduction</b>       |          |                                                                                                                                                                                            |                                                 |                                                                                                                                                                                                                                                                                                                                                                                                                                             |                                                 |
| Background rationale      | 2        | Explain the scientific background and rationale for the investigation being reported                                                                                                       | 3                                               |                                                                                                                                                                                                                                                                                                                                                                                                                                             |                                                 |
| Objectives                | 3        | State specific objectives, including any prespecified hypotheses                                                                                                                           | 3                                               |                                                                                                                                                                                                                                                                                                                                                                                                                                             |                                                 |
| <b>Methods</b>            |          |                                                                                                                                                                                            |                                                 |                                                                                                                                                                                                                                                                                                                                                                                                                                             |                                                 |
| Study Design              | 4        | Present key elements of study design early in the paper                                                                                                                                    | 4                                               |                                                                                                                                                                                                                                                                                                                                                                                                                                             |                                                 |
| Setting                   | 5        | Describe the setting, locations, and relevant dates, including periods of recruitment, exposure, follow-up, and data collection                                                            | 4                                               |                                                                                                                                                                                                                                                                                                                                                                                                                                             |                                                 |

|                              |   |                                                                                                                                                                                                                                                                                                                                                                                                                                                                                                                                                                                                                                                                                                                              |   |                                                                                                                                                                                                                                                                                                                                                                                                                                                                                                                                                                                                                                                                                                      |                                                                                                                                                                                         |
|------------------------------|---|------------------------------------------------------------------------------------------------------------------------------------------------------------------------------------------------------------------------------------------------------------------------------------------------------------------------------------------------------------------------------------------------------------------------------------------------------------------------------------------------------------------------------------------------------------------------------------------------------------------------------------------------------------------------------------------------------------------------------|---|------------------------------------------------------------------------------------------------------------------------------------------------------------------------------------------------------------------------------------------------------------------------------------------------------------------------------------------------------------------------------------------------------------------------------------------------------------------------------------------------------------------------------------------------------------------------------------------------------------------------------------------------------------------------------------------------------|-----------------------------------------------------------------------------------------------------------------------------------------------------------------------------------------|
| Participants                 | 6 | <p>(a) <i>Cohort study</i> - Give the eligibility criteria, and the sources and methods of selection of participants. Describe methods of follow-up</p> <p><i>Case-control study</i> - Give the eligibility criteria, and the sources and methods of case ascertainment and control selection. Give the rationale for the choice of cases and controls</p> <p><i>Cross-sectional study</i> - Give the eligibility criteria, and the sources and methods of selection of participants</p> <p>(b) <i>Cohort study</i> - For matched studies, give matching criteria and number of exposed and unexposed</p> <p><i>Case-control study</i> - For matched studies, give matching criteria and the number of controls per case</p> | 4 | <p>RECORD 6.1: The methods of study population selection (such as codes or algorithms used to identify subjects) should be listed in detail. If this is not possible, an explanation should be provided.</p> <p>RECORD 6.2: Any validation studies of the codes or algorithms used to select the population should be referenced. If validation was conducted for this study and not published elsewhere, detailed methods and results should be provided.</p> <p>RECORD 6.3: If the study involved linkage of databases, consider use of a flow diagram or other graphical display to demonstrate the data linkage process, including the number of individuals with linked data at each stage.</p> | <p>4</p> <p>Richard et al 2019, a validation study that uses Z59.0 as a component to their ascertainment algorithm was cited. However, this study used pre-mandate data.</p> <p>N/A</p> |
| Variables                    | 7 | Clearly define all outcomes, exposures, predictors, potential confounders, and effect modifiers. Give diagnostic criteria, if applicable.                                                                                                                                                                                                                                                                                                                                                                                                                                                                                                                                                                                    | 4 | RECORD 7.1: A complete list of codes and algorithms used to classify exposures, outcomes, confounders, and effect modifiers should be provided. If these cannot be reported, an explanation should be provided.                                                                                                                                                                                                                                                                                                                                                                                                                                                                                      | 4                                                                                                                                                                                       |
| Data sources/<br>measurement | 8 | For each variable of interest, give sources of data and details of methods of assessment (measurement). Describe comparability of assessment methods if there is more than one group                                                                                                                                                                                                                                                                                                                                                                                                                                                                                                                                         | 4 |                                                                                                                                                                                                                                                                                                                                                                                                                                                                                                                                                                                                                                                                                                      |                                                                                                                                                                                         |

|                                                                                                                                              |                                  |    |                                                                                                                                                                                                                                                                                                                                                                                                                                                                                                                                                                      |                                                |                                                                                                                                                                                                                     |
|----------------------------------------------------------------------------------------------------------------------------------------------|----------------------------------|----|----------------------------------------------------------------------------------------------------------------------------------------------------------------------------------------------------------------------------------------------------------------------------------------------------------------------------------------------------------------------------------------------------------------------------------------------------------------------------------------------------------------------------------------------------------------------|------------------------------------------------|---------------------------------------------------------------------------------------------------------------------------------------------------------------------------------------------------------------------|
| 1<br>2<br>3<br>4<br>5<br>6<br>7<br>8<br>9<br>10                                                                                              | Bias                             | 9  | Describe any efforts to address potential sources of bias                                                                                                                                                                                                                                                                                                                                                                                                                                                                                                            |                                                |                                                                                                                                                                                                                     |
| 11<br>12<br>13<br>14<br>15<br>16<br>17<br>18<br>19<br>20<br>21<br>22<br>23<br>24<br>25<br>26<br>27<br>28<br>29<br>30<br>31<br>32<br>33<br>34 | Study size                       | 10 | Explain how the study size was arrived at                                                                                                                                                                                                                                                                                                                                                                                                                                                                                                                            | Page 4 for exclusions<br>Page 5 for study size |                                                                                                                                                                                                                     |
| 35<br>36<br>37<br>38<br>39<br>40<br>41<br>42<br>43<br>44<br>45<br>46<br>47                                                                   | Quantitative variables           | 11 | Explain how quantitative variables were handled in the analyses. If applicable, describe which groupings were chosen, and why                                                                                                                                                                                                                                                                                                                                                                                                                                        | 4                                              |                                                                                                                                                                                                                     |
|                                                                                                                                              | Statistical methods              | 12 | (a) Describe all statistical methods, including those used to control for confounding<br>(b) Describe any methods used to examine subgroups and interactions<br>(c) Explain how missing data were addressed<br>(d) <i>Cohort study</i> - If applicable, explain how loss to follow-up was addressed<br><i>Case-control study</i> - If applicable, explain how matching of cases and controls was addressed<br><i>Cross-sectional study</i> - If applicable, describe analytical methods taking account of sampling strategy<br>(e) Describe any sensitivity analyses | 4 - 5                                          |                                                                                                                                                                                                                     |
|                                                                                                                                              | Data access and cleaning methods |    | ..                                                                                                                                                                                                                                                                                                                                                                                                                                                                                                                                                                   |                                                | RECORD 12.1: Authors should describe the extent to which the investigators had access to the database population used to create the study population.<br><br>N/A as the study population is the database population |

|                  |    |                                                                                                                                                                                                                                                                                                                                                 |                                |                                                                                                                                                                                                                                                                                                                    |                                                      |
|------------------|----|-------------------------------------------------------------------------------------------------------------------------------------------------------------------------------------------------------------------------------------------------------------------------------------------------------------------------------------------------|--------------------------------|--------------------------------------------------------------------------------------------------------------------------------------------------------------------------------------------------------------------------------------------------------------------------------------------------------------------|------------------------------------------------------|
|                  |    |                                                                                                                                                                                                                                                                                                                                                 |                                | RECORD 12.2: Authors should provide information on the data cleaning methods used in the study.                                                                                                                                                                                                                    | N/A                                                  |
| Linkage          |    | ..                                                                                                                                                                                                                                                                                                                                              |                                | RECORD 12.3: State whether the study included person-level, institutional-level, or other data linkage across two or more databases. The methods of linkage and methods of linkage quality evaluation should be provided.                                                                                          | N/A, as all data that is used is within the database |
| <b>Results</b>   |    |                                                                                                                                                                                                                                                                                                                                                 |                                |                                                                                                                                                                                                                                                                                                                    |                                                      |
| Participants     | 13 | (a) Report the numbers of individuals at each stage of the study ( <i>e.g.</i> , numbers potentially eligible, examined for eligibility, confirmed eligible, included in the study, completing follow-up, and analysed)<br>(b) Give reasons for non-participation at each stage.<br>(c) Consider use of a flow diagram                          | Page 4. Flow chart in Figure 1 | RECORD 13.1: Describe in detail the selection of the persons included in the study ( <i>i.e.</i> , study population selection) including filtering based on data quality, data availability and linkage. The selection of included persons can be described in the text and/or by means of the study flow diagram. | Page 4. Flow chart in Figure 1                       |
| Descriptive data | 14 | (a) Give characteristics of study participants ( <i>e.g.</i> , demographic, clinical, social) and information on exposures and potential confounders<br>(b) Indicate the number of participants with missing data for each variable of interest<br>(c) <i>Cohort study</i> - summarise follow-up time ( <i>e.g.</i> , average and total amount) | 5                              |                                                                                                                                                                                                                                                                                                                    |                                                      |
| Outcome data     | 15 | <i>Cohort study</i> - Report numbers of outcome events or summary measures over time<br><i>Case-control study</i> - Report numbers in each exposure                                                                                                                                                                                             | 5                              |                                                                                                                                                                                                                                                                                                                    |                                                      |

|                   |    |                                                                                                                                                                                                                                                                                                                                                                                                                 |   |                                                                                                                                                                                                                                                                                                          |   |
|-------------------|----|-----------------------------------------------------------------------------------------------------------------------------------------------------------------------------------------------------------------------------------------------------------------------------------------------------------------------------------------------------------------------------------------------------------------|---|----------------------------------------------------------------------------------------------------------------------------------------------------------------------------------------------------------------------------------------------------------------------------------------------------------|---|
|                   |    | category, or summary measures of exposure<br><i>Cross-sectional study</i> - Report numbers of outcome events or summary measures                                                                                                                                                                                                                                                                                |   |                                                                                                                                                                                                                                                                                                          |   |
| Main results      | 16 | (a) Give unadjusted estimates and, if applicable, confounder-adjusted estimates and their precision (e.g., 95% confidence interval). Make clear which confounders were adjusted for and why they were included<br>(b) Report category boundaries when continuous variables were categorized<br>(c) If relevant, consider translating estimates of relative risk into absolute risk for a meaningful time period | 6 |                                                                                                                                                                                                                                                                                                          |   |
| Other analyses    | 17 | Report other analyses done— e.g., analyses of subgroups and interactions, and sensitivity analyses                                                                                                                                                                                                                                                                                                              | 6 |                                                                                                                                                                                                                                                                                                          |   |
| <b>Discussion</b> |    |                                                                                                                                                                                                                                                                                                                                                                                                                 |   |                                                                                                                                                                                                                                                                                                          |   |
| Key results       | 18 | Summarise key results with reference to study objectives                                                                                                                                                                                                                                                                                                                                                        | 6 |                                                                                                                                                                                                                                                                                                          |   |
| Limitations       | 19 | Discuss limitations of the study, taking into account sources of potential bias or imprecision. Discuss both direction and magnitude of any potential bias                                                                                                                                                                                                                                                      | 7 | RECORD 19.1: Discuss the implications of using data that were not created or collected to answer the specific research question(s). Include discussion of misclassification bias, unmeasured confounding, missing data, and changing eligibility over time, as they pertain to the study being reported. | 7 |
| Interpretation    | 20 | Give a cautious overall interpretation of results considering objectives,                                                                                                                                                                                                                                                                                                                                       | 6 |                                                                                                                                                                                                                                                                                                          |   |



|                                                           |    |                                                                                                                                                               |                                                                 |                                                                                                                                                          |                                         |
|-----------------------------------------------------------|----|---------------------------------------------------------------------------------------------------------------------------------------------------------------|-----------------------------------------------------------------|----------------------------------------------------------------------------------------------------------------------------------------------------------|-----------------------------------------|
|                                                           |    | limitations, multiplicity of analyses, results from similar studies, and other relevant evidence                                                              |                                                                 |                                                                                                                                                          |                                         |
| Generalisability                                          | 21 | Discuss the generalisability (external validity) of the study results                                                                                         | N/A as this isn't a sample, but all hospitalizations with Z59.0 |                                                                                                                                                          |                                         |
| <b>Other Information</b>                                  |    |                                                                                                                                                               |                                                                 |                                                                                                                                                          |                                         |
| Funding                                                   | 22 | Give the source of funding and the role of the funders for the present study and, if applicable, for the original study on which the present article is based | 8                                                               |                                                                                                                                                          |                                         |
| Accessibility of protocol, raw data, and programming code |    | ..                                                                                                                                                            |                                                                 | RECORD 22.1: Authors should provide information on how to access any supplemental information such as the study protocol, raw data, or programming code. | N/A as data is not publically available |

\*Reference: Benchimol EI, Smeeth L, Guttman A, Harron K, Moher D, Petersen I, Sørensen HT, von Elm E, Langan SM, the RECORD Working Committee. The REporting of studies Conducted using Observational Routinely-collected health Data (RECORD) Statement. *PLoS Medicine* 2015; in press.

\*Checklist is protected under Creative Commons Attribution ([CC BY](https://creativecommons.org/licenses/by/4.0/)) license.

1  
2  
3  
4  
5  
6  
7  
8  
9  
10  
11  
12  
13  
14  
15  
16  
17  
18  
19  
20  
21  
22  
23  
24  
25  
26  
27  
28  
29  
30  
31  
32  
33  
34  
35  
36  
37  
38  
39  
40  
41  
42  
43  
44  
45  
46  
47

Figure 1: Hospitalization Records and Episode Building, 2015 – 2020, Canada, Analytic Flow Chart

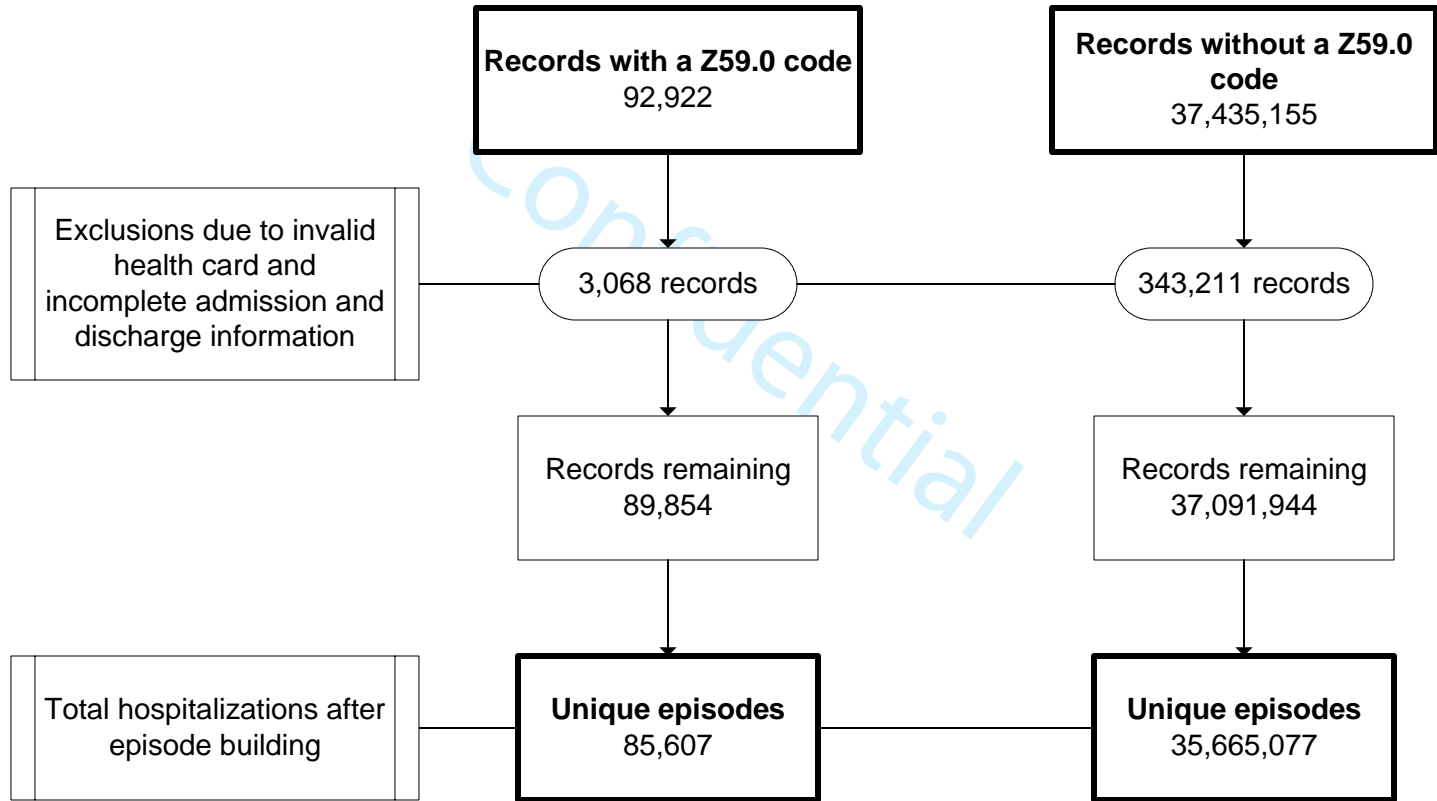

Table 1: Frequency and Proportion of Hospitalizations\* for People Experiencing Homelessness by Fiscal Year and Province/ Territory, HMDB, FY 2015-2020

|                           |                | 2015  | 2016  | 2017   | 2018   | 2019   | 2020   |
|---------------------------|----------------|-------|-------|--------|--------|--------|--------|
| Canada                    | Frequency      | 6,934 | 7,896 | 10,014 | 18,489 | 20,745 | 21,529 |
|                           | Proportion (%) | 0.12  | 0.13  | 0.16   | 0.3    | 0.34   | 0.41   |
| Alberta                   | Frequency      | 1,211 | 1,215 | 1,340  | 3,620  | 4,219  | 4,540  |
|                           | Proportion (%) | 0.19  | 0.17  | 0.19   | 0.5    | 0.61   | 0.75   |
| British Columbia          | Frequency      | 3,961 | 4,648 | 5,894  | 6,724  | 6,943  | 6,679  |
|                           | Proportion (%) | 0.47  | 0.53  | 0.67   | 0.74   | 0.77   | 0.79   |
| Manitoba                  | Frequency      | 197   | 268   | 397    | 785    | 923    | 994    |
|                           | Proportion (%) | 0.09  | 0.12  | 0.17   | 0.34   | 0.4    | 0.51   |
| New Brunswick             | Frequency      | 47    | 50    | 62     | 182    | 320    | 294    |
|                           | Proportion (%) | 0.04  | 0.04  | 0.05   | 0.15   | 0.28   | 0.28   |
| Newfoundland and Labrador | Frequency      | 35    | 33    | 27     | 33     | 45     | 52     |
|                           | Proportion (%) | 0.02  | 0.02  | 0.02   | 0.02   | 0.03   | 0.05   |
| Nova Scotia               | Frequency      | 99    | 81    | 83     | 216    | 248    | 355    |
|                           | Proportion (%) | 0.05  | 0.04  | 0.04   | 0.11   | 0.13   | 0.22   |
| Ontario                   | Frequency      | 436   | 570   | 717    | 4,057  | 4,791  | 4,993  |
|                           | Proportion (%) | 0.02  | 0.02  | 0.03   | 0.16   | 0.2    | 0.24   |
| Prince Edward Island      | Frequency      | 17    | 16    | 36     | 48     | 71     | 36     |
|                           | Proportion (%) | 0.06  | 0.06  | 0.12   | 0.16   | 0.24   | 0.14   |
| Quebec                    | Frequency      | 772   | 816   | 1,210  | 2,176  | 2,404  | 2,546  |
|                           | Proportion (%) | 0.07  | 0.07  | 0.11   | 0.19   | 0.22   | 0.28   |
| Saskatchewan              | Frequency      | 127   | 154   | 167    | 438    | 554    | 631    |
|                           | Proportion (%) | 0.05  | 0.06  | 0.07   | 0.18   | 0.22   | 0.31   |
| Territories               | Frequency      | 32    | 45    | 81     | 210    | 227    | 409    |
|                           | Proportion (%) | 0.18  | 0.27  | 0.45   | 1.1    | 1.24   | 2.22   |

## Source:

Hospital Morbidity Database (HMDB), 2015–2016 to 2020–2021, Canadian Institute for Health Information.

## Notes:

\* The unit of analysis is a unique episode of care, which is constructed by linking contiguous acute inpatient hospitalizations and day procedure visits. Hospitalization frequencies for individual Territories not shown due to small cell counts increasing the risk of identification.

Confidential

1  
2  
3  
4  
5  
6  
7  
8  
9  
10  
11  
12  
13  
14  
15  
16  
17  
18  
19  
20  
21  
22  
23  
24  
25  
26  
27  
28  
29  
30  
31  
32  
33  
34  
35  
36  
37  
38  
39  
40  
41  
42  
43  
44  
45  
46  
47  
48  
49  
50  
51  
52  
53  
54  
55  
56  
57  
58  
59  
60

Table for figure 2: Frequency and Proportion of PEH (ICD-10-CA Z59.0) Hospitalizations, HMDB, 2015 - 2020

| Fiscal Quarter | PEH Frequency | Total Hospitalizations | Percent PEH |
|----------------|---------------|------------------------|-------------|
| 2015Q1         | 1,618         | 1,530,802              | 0.105696    |
| 2015Q2         | 1,854         | 1,432,912              | 0.129387    |
| 2015Q3         | 1,881         | 1,474,212              | 0.127594    |
| 2015Q4         | 1,581         | 1,463,492              | 0.108029    |
| 2016Q1         | 1,781         | 1,586,362              | 0.112269    |
| 2016Q2         | 2,103         | 1,457,133              | 0.144325    |
| 2016Q3         | 2,054         | 1,507,421              | 0.136259    |
| 2016Q4         | 1,958         | 1,549,004              | 0.126404    |
| 2017Q1         | 2,272         | 1,575,285              | 0.144228    |
| 2017Q2         | 2,557         | 1,468,265              | 0.174151    |
| 2017Q3         | 2,667         | 1,537,309              | 0.173485    |
| 2017Q4         | 2,518         | 1,555,462              | 0.161881    |
| 2018Q1         | 4,321         | 1,605,952              | 0.269062    |
| 2018Q2         | 4,768         | 1,484,701              | 0.321142    |
| 2018Q3         | 5,034         | 1,570,624              | 0.32051     |
| 2018Q4         | 4,366         | 1,560,174              | 0.279841    |
| 2019Q1         | 4,764         | 1,608,733              | 0.296134    |
| 2019Q2         | 5,276         | 1,513,756              | 0.348537    |
| 2019Q3         | 5,292         | 1,549,578              | 0.341512    |
| 2019Q4         | 5,413         | 1,452,110              | 0.372768    |
| 2020Q1         | 5,188         | 959,019                | 0.540969    |
| 2020Q2         | 5,402         | 1,437,509              | 0.375789    |
| 2020Q3         | 5,574         | 1,440,191              | 0.387032    |
| 2020Q4         | 5,365         | 1,430,678              | 0.374997    |

Source:  
Hospital Morbidity Database (HMDB), 2015–2016 to 2020–2021, Canadian Institute for Health Information.

Notes:  
\* The unit of analysis is a unique episode of care, which is constructed by linking contiguous acute inpatient hospitalizations and day procedure visits.  
† Time points are displayed in fiscal quarters. For example, "2015Q1" represents the period April 1, 2015 through June 30, 2015.  
PEH - People experiencing homelessness

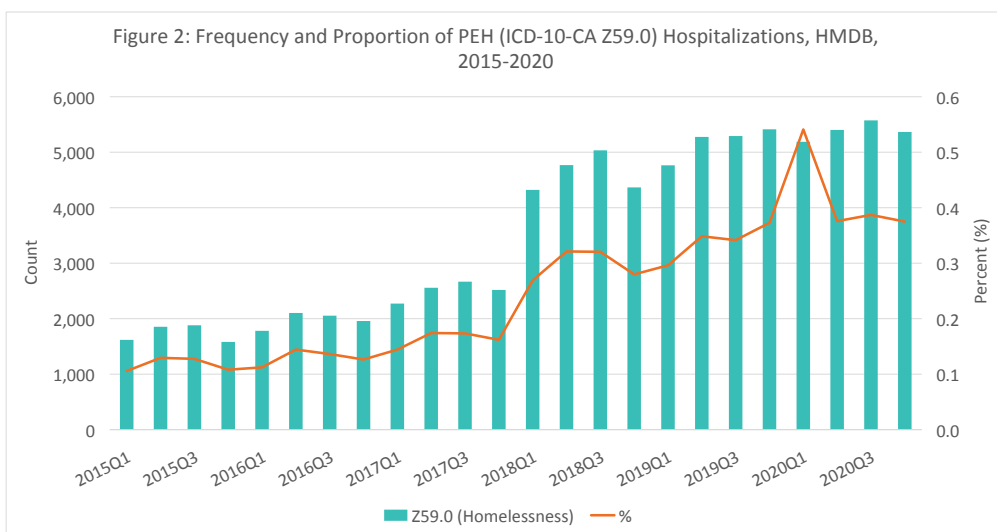

Table for Figure 3: Province Stratified Trends of PEH (Z59.0) by Fiscal Quarter, 2015-2020

|                  | 2015Q1                 | 2015Q2  | 2015Q3  | 2015Q4  | 2016Q1  | 2016Q2  | 2016Q3  | 2016Q4  | 2017Q1  | 2017Q2  | 2017Q3  | 2017Q4  | 2018Q1  | 2018Q2  | 2018Q3  | 2018Q4  | 2019Q1  | 2019Q2  | 2019Q3  | 2019Q4  | 2020Q1  | 2020Q2  | 2020Q3  | 2020Q4  |         |
|------------------|------------------------|---------|---------|---------|---------|---------|---------|---------|---------|---------|---------|---------|---------|---------|---------|---------|---------|---------|---------|---------|---------|---------|---------|---------|---------|
| Alberta          | PEH Frequency          | 271     | 374     | 314     | 252     | 289     | 335     | 309     | 282     | 289     | 312     | 411     | 328     | 817     | 914     | 982     | 907     | 930     | 1,032   | 1,065   | 1,192   | 1,189   | 1,107   | 1,182   | 1,062   |
|                  | Total Hospitalizations | 169,674 | 155,555 | 162,663 | 162,977 | 183,455 | 166,816 | 173,224 | 178,525 | 183,787 | 167,359 | 176,536 | 180,244 | 188,052 | 171,137 | 182,027 | 181,876 | 189,575 | 175,247 | 165,479 | 159,086 | 124,430 | 158,646 | 158,883 | 167,024 |
|                  | Percent (%)            | 0.16    | 0.24    | 0.19    | 0.15    | 0.16    | 0.2     | 0.18    | 0.16    | 0.16    | 0.19    | 0.23    | 0.18    | 0.43    | 0.53    | 0.54    | 0.5     | 0.49    | 0.59    | 0.64    | 0.75    | 0.96    | 0.7     | 0.74    | 0.64    |
| British Columbia | PEH Frequency          | 926     | 1,016   | 1,094   | 925     | 1,029   | 1,127   | 1,241   | 1,141   | 1,384   | 1,487   | 1,529   | 1,494   | 1,667   | 1,735   | 1,772   | 1,550   | 1,608   | 1,848   | 1,739   | 1,748   | 1,528   | 1,664   | 1,749   | 1,738   |
|                  | Total Hospitalizations | 217,927 | 206,668 | 210,577 | 209,589 | 225,827 | 210,168 | 212,818 | 222,903 | 224,939 | 210,883 | 216,126 | 224,510 | 229,915 | 217,666 | 229,932 | 239,926 | 234,133 | 227,045 | 227,672 | 216,872 | 162,961 | 225,013 | 224,845 | 232,733 |
|                  | Percent (%)            | 0.42    | 0.49    | 0.52    | 0.44    | 0.46    | 0.59    | 0.58    | 0.51    | 0.62    | 0.71    | 0.71    | 0.67    | 0.73    | 0.8     | 0.78    | 0.67    | 0.69    | 0.81    | 0.76    | 0.81    | 0.94    | 0.74    | 0.78    | 0.75    |
| Manitoba         | PEH Frequency          | 39      | 63      | 55      | 40      | 65      | 51      | 71      | 81      | 74      | 126     | 108     | 89      | 203     | 200     | 203     | 179     | 217     | 237     | 239     | 230     | 213     | 261     | 252     | 268     |
|                  | Total Hospitalizations | 57,205  | 54,465  | 55,905  | 54,355  | 59,073  | 55,356  | 56,327  | 58,004  | 58,711  | 56,127  | 57,879  | 58,422  | 59,741  | 55,931  | 58,410  | 57,638  | 60,687  | 57,758  | 59,515  | 55,693  | 42,524  | 57,073  | 47,519  | 49,192  |
|                  | Percent (%)            | 0.07    | 0.12    | 0.1     | 0.07    | 0.11    | 0.09    | 0.13    | 0.14    | 0.13    | 0.22    | 0.19    | 0.15    | 0.34    | 0.36    | 0.35    | 0.31    | 0.36    | 0.41    | 0.4     | 0.41    | 0.5     | 0.46    | 0.53    | 0.54    |
| Atlantic Canada  | PEH Frequency          | 47      | 67      | 41      | 43      | 45      | 60      | 46      | 29      | 52      | 57      | 48      | 51      | 113     | 139     | 133     | 94      | 170     | 165     | 180     | 169     | 186     | 192     | 189     | 170     |
|                  | Total Hospitalizations | 122,867 | 114,027 | 117,816 | 117,069 | 127,905 | 114,858 | 119,842 | 123,368 | 124,953 | 113,198 | 118,949 | 123,497 | 127,335 | 115,368 | 121,366 | 123,438 | 124,162 | 113,981 | 119,687 | 112,066 | 67,337  | 109,775 | 116,468 | 113,510 |
|                  | Percent (%)            | 0.04    | 0.06    | 0.03    | 0.04    | 0.04    | 0.05    | 0.04    | 0.02    | 0.04    | 0.05    | 0.04    | 0.04    | 0.09    | 0.12    | 0.11    | 0.08    | 0.14    | 0.14    | 0.15    | 0.15    | 0.28    | 0.17    | 0.16    | 0.15    |
| Ontario          | PEH Frequency          | 105     | 105     | 128     | 98      | 112     | 157     | 148     | 153     | 133     | 192     | 199     | 193     | 871     | 1,053   | 1,167   | 966     | 1,125   | 1,173   | 1,264   | 1,229   | 1,282   | 1,251   | 1,243   | 1,217   |
|                  | Total Hospitalizations | 618,578 | 575,425 | 586,804 | 585,881 | 633,019 | 579,572 | 599,110 | 607,448 | 629,186 | 582,245 | 613,732 | 610,732 | 640,429 | 588,711 | 624,217 | 613,630 | 642,359 | 602,241 | 622,834 | 575,526 | 333,610 | 576,629 | 586,860 | 572,864 |
|                  | Percent (%)            | 0.02    | 0.02    | 0.02    | 0.02    | 0.02    | 0.03    | 0.02    | 0.03    | 0.02    | 0.03    | 0.03    | 0.03    | 0.14    | 0.18    | 0.19    | 0.16    | 0.18    | 0.19    | 0.2     | 0.21    | 0.38    | 0.22    | 0.21    | 0.21    |
| Territories      | PEH Frequency          | *       | *       | *       | 12      | 16      | *       | 12      | 29      | 25      | 16      | 11      | 56      | 67      | 45      | 42      | 48      | 68      | 48      | 63      | 91      | 102     | 124     | 92      |         |
|                  | Total Hospitalizations | 4,530   | 4,370   | 4,326   | 4,211   | 4,583   | 4,179   | 3,836   | 4,200   | 4,510   | 4,477   | 4,294   | 4,789   | 4,806   | 4,603   | 4,773   | 4,935   | 4,788   | 4,827   | 4,577   | 4,175   | 3,992   | 5,185   | 4,656   | 4,620   |
|                  | Percent (%)            | *       | *       | *       | *       | 0.26    | 0.38    | *       | 0.29    | 0.64    | 0.56    | 0.37    | 0.23    | 1.17    | 1.46    | 0.94    | 0.85    | 1       | 1.41    | 1.05    | 1.51    | 2.28    | 1.97    | 2.66    | 1.93    |
| Quebec           | PEH Frequency          | 190     | 193     | 206     | 183     | 189     | 203     | 203     | 221     | 268     | 322     | 311     | 368     | 475     | 552     | 628     | 521     | 556     | 604     | 614     | 630     | 587     | 671     | 653     | 635     |
|                  | Total Hospitalizations | 276,844 | 262,542 | 275,649 | 269,523 | 287,795 | 265,438 | 279,903 | 289,698 | 285,443 | 271,708 | 287,501 | 290,512 | 290,817 | 271,409 | 291,516 | 285,264 | 288,488 | 270,963 | 287,220 | 269,194 | 188,427 | 247,243 | 243,814 | 236,152 |
|                  | Percent (%)            | 0.07    | 0.07    | 0.07    | 0.07    | 0.08    | 0.07    | 0.08    | 0.09    | 0.12    | 0.11    | 0.11    | 0.16    | 0.2     | 0.22    | 0.22    | 0.18    | 0.19    | 0.22    | 0.21    | 0.23    | 0.31    | 0.27    | 0.27    | 0.27    |
| Saskatchewan     | PEH Frequency          | 30      | 24      | 39      | 34      | 40      | 44      | 31      | 39      | 43      | 36      | 45      | 43      | 119     | 108     | 104     | 107     | 110     | 149     | 143     | 152     | 112     | 154     | 182     | 183     |
|                  | Total Hospitalizations | 63,097  | 59,767  | 60,378  | 59,799  | 64,661  | 60,699  | 62,304  | 64,799  | 63,755  | 61,268  | 62,292  | 62,755  | 64,656  | 59,686  | 62,175  | 62,328  | 64,462  | 60,605  | 62,449  | 59,398  | 36,638  | 57,939  | 57,144  | 54,583  |
|                  | Percent (%)            | 0.05    | 0.04    | 0.06    | 0.06    | 0.06    | 0.07    | 0.05    | 0.06    | 0.07    | 0.06    | 0.07    | 0.07    | 0.18    | 0.18    | 0.17    | 0.17    | 0.17    | 0.25    | 0.23    | 0.26    | 0.31    | 0.27    | 0.32    | 0.34    |

Source: Hospital Morbidity Database (HMD8), 2015–2016 to 2020–2021, Canadian Institute for Health Information.

Notes: \* The unit of analysis is a unique episode of care, which is constructed by linking contiguous acute inpatient hospitalizations and day procedure visits. † Time points are displayed in fiscal quarters. For example, "2015Q1" represents the period April 1, 2015 through June 30, 2015. PEH - People experiencing homelessness. Atlantic provinces (Nova Scotia, New Brunswick, Newfoundland and Labrador, and Prince Edward Island) and the Territories (Northwest Territories, Nunavut, Yukon) have been combined due to geographic similarities and to avoid data suppression. The Territories have been left out of the figure due to relatively small PEH frequencies.

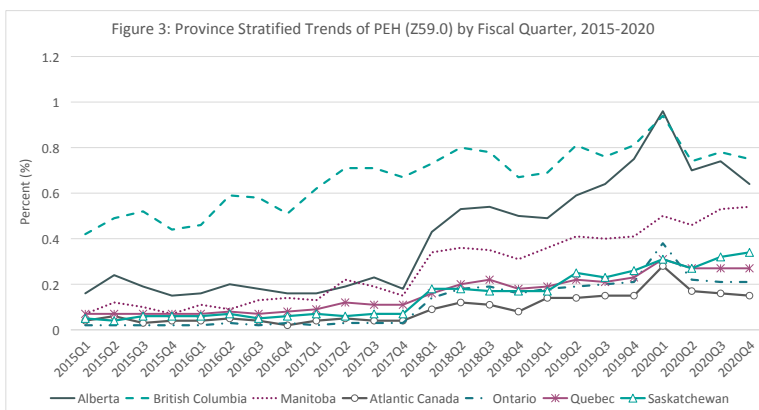

Table for Figure 4: Groups of Census Subdivisions Stratified Trends of PEH by Fiscal Quarter, 2015-2020

|                                                |                        | 2015Q1  | 2015Q2  | 2015Q3  | 2015Q4  | 2016Q1  | 2016Q2  | 2016Q3  | 2016Q4  | 2017Q1  | 2017Q2  | 2017Q3  | 2017Q4  | 2018Q1  | 2018Q2  | 2018Q3  | 2018Q4  | 2019Q1  | 2019Q2  | 2019Q3  | 2019Q4  | 2020Q1  | 2020Q2  | 2020Q3  | 2020Q4  |
|------------------------------------------------|------------------------|---------|---------|---------|---------|---------|---------|---------|---------|---------|---------|---------|---------|---------|---------|---------|---------|---------|---------|---------|---------|---------|---------|---------|---------|
| Major CMA<br>(Toronto, Montreal,<br>Vancouver) | PEH Frequency          | 840     | 923     | 1,014   | 860     | 911     | 1,074   | 1,112   | 1,084   | 1,187   | 1,233   | 1,315   | 1,250   | 1,542   | 1,699   | 1,962   | 1,674   | 1,696   | 1,820   | 1,814   | 1,791   | 1,769   | 1,685   | 1,705   | 1,669   |
|                                                | Total Hospitalizations | 484,921 | 459,618 | 467,591 | 464,659 | 502,081 | 470,424 | 482,300 | 491,929 | 502,642 | 474,149 | 493,001 | 495,368 | 513,358 | 481,844 | 507,499 | 499,702 | 515,668 | 493,959 | 509,793 | 471,316 | 303,674 | 483,913 | 471,298 | 450,006 |
|                                                | Percent (%)            | 0.17    | 0.2     | 0.22    | 0.19    | 0.18    | 0.23    | 0.23    | 0.22    | 0.24    | 0.26    | 0.27    | 0.25    | 0.32    | 0.35    | 0.39    | 0.34    | 0.33    | 0.37    | 0.36    | 0.38    | 0.58    | 0.58    | 0.35    | 0.36    |
| Other CMA                                      | PEH Frequency          | 469     | 561     | 555     | 434     | 526     | 600     | 606     | 552     | 607     | 700     | 844     | 722     | 1,722   | 1,980   | 2,047   | 1,798   | 2,013   | 2,323   | 2,337   | 2,440   | 2,300   | 2,455   | 2,534   | 2,447   |
|                                                | Total Hospitalizations | 626,797 | 582,437 | 607,093 | 601,043 | 656,675 | 598,182 | 624,126 | 640,992 | 652,921 | 604,177 | 638,849 | 646,898 | 670,383 | 614,040 | 654,799 | 652,427 | 673,508 | 628,946 | 636,803 | 599,312 | 399,914 | 578,051 | 591,458 | 601,846 |
|                                                | Percent (%)            | 0.07    | 0.1     | 0.09    | 0.07    | 0.08    | 0.1     | 0.1     | 0.09    | 0.09    | 0.12    | 0.13    | 0.11    | 0.26    | 0.32    | 0.31    | 0.28    | 0.3     | 0.37    | 0.37    | 0.41    | 0.58    | 0.42    | 0.43    | 0.41    |
| Census Amalgamations                           | PEH Frequency          | 251     | 307     | 243     | 234     | 260     | 349     | 264     | 257     | 402     | 532     | 440     | 476     | 775     | 857     | 876     | 756     | 872     | 959     | 970     | 1,012   | 959     | 1,053   | 1,113   | 1,042   |
|                                                | Total Hospitalizations | 293,520 | 274,472 | 281,132 | 279,295 | 300,551 | 274,407 | 283,150 | 293,981 | 296,070 | 277,075 | 288,247 | 293,941 | 300,290 | 277,371 | 290,303 | 289,777 | 297,441 | 278,440 | 288,292 | 273,515 | 183,402 | 268,798 | 270,021 | 272,451 |
|                                                | Percent (%)            | 0.09    | 0.11    | 0.09    | 0.08    | 0.09    | 0.13    | 0.09    | 0.09    | 0.14    | 0.19    | 0.15    | 0.16    | 0.26    | 0.31    | 0.3     | 0.26    | 0.29    | 0.34    | 0.34    | 0.37    | 0.52    | 0.39    | 0.41    | 0.38    |
| Rural Areas                                    | PEH Frequency          | 58      | 63      | 69      | 53      | 84      | 80      | 72      | 65      | 76      | 92      | 68      | 70      | 182     | 232     | 149     | 138     | 183     | 174     | 171     | 170     | 160     | 209     | 222     | 207     |
|                                                | Total Hospitalizations | 122,253 | 113,713 | 115,459 | 115,692 | 123,694 | 111,404 | 114,901 | 119,071 | 120,482 | 110,461 | 114,317 | 116,530 | 118,592 | 109,040 | 114,930 | 115,388 | 118,711 | 109,759 | 111,583 | 105,305 | 71,026  | 104,540 | 104,698 | 104,960 |
|                                                | Percent (%)            | 0.05    | 0.06    | 0.06    | 0.05    | 0.07    | 0.07    | 0.06    | 0.05    | 0.06    | 0.08    | 0.06    | 0.06    | 0.15    | 0.21    | 0.13    | 0.12    | 0.15    | 0.16    | 0.15    | 0.16    | 0.23    | 0.2     | 0.21    | 0.2     |

Source:  
Hospital Morbidity Database (HMD8), 2015–2016 to 2020–2021, Canadian Institute for Health Information.

Notes:  
\* The unit of analysis is a unique episode of care, which is constructed by linking contiguous acute inpatient hospitalizations and day procedure visits.  
† Time points are displayed in fiscal quarters. For example, "2015Q1" represents the period April 1, 2015 through June 30, 2015.  
See here for an additional aid for geographic breakdowns: <https://www12.statcan.gc.ca/census-recensement/2011/ref/dict/figures/figure3-dict-eng.cfm>  
PEH - People experiencing homelessness

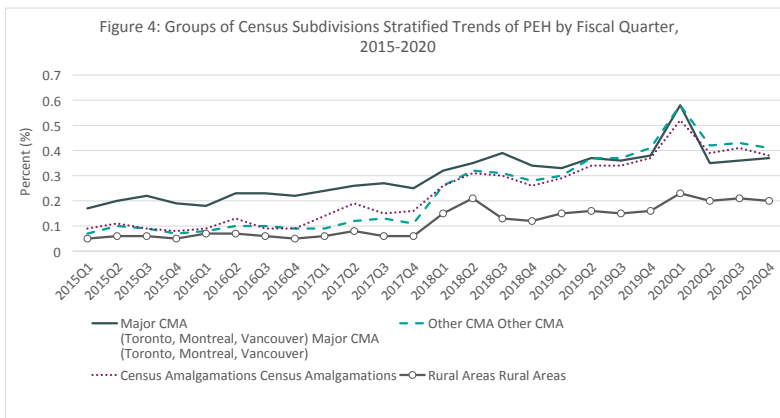

Confidential

Table 2: Adjusted Odds Ratios (AOR) from Logistic Regression Models on PEH Identification, HMDB 2015 to 2020

| Variable | Level                        | Primary Model |              |              |         | Primary + PT Adjusted |              |              |         | Primary + CMA Adjusted |              |              |         |
|----------|------------------------------|---------------|--------------|--------------|---------|-----------------------|--------------|--------------|---------|------------------------|--------------|--------------|---------|
|          |                              | AOR           | Lower 95% CI | Upper 95% CI | P value | AOR                   | Lower 95% CI | Upper 95% CI | P value | AOR                    | Lower 95% CI | Upper 95% CI | P value |
| Period   | Pre-Mandate                  | ref           | ref          | ref          | ref     | ref                   | ref          | ref          | ref     | ref                    | ref          | ref          | ref     |
|          | Post-Mandate (at Quarter 17) | 1.589         | 1.527        | 1.653        | <0.0001 | 1.585                 | 1.524        | 1.649        | <0.0001 | 1.589                  | 1.527        | 1.653        | <0.1    |
|          | Pandemic (at Quarter 21)     | 2.039         | 1.926        | 2.158        | <0.0001 | 1.935                 | 1.828        | 2.049        | <0.0001 | 2.037                  | 1.924        | 2.156        | <0.1    |

Source:

Hospital Morbidity Database (HMDB), 2015–2016 to 2020–2021, Canadian Institute for Health Information.

**Notes:**

Primary logistic regression model adjusted for period, fiscal quarter, and their interaction effect

PEH - People experiencing homelessness

Confidential

Table for figure 5: Adjusted Odds Ratios (AOR) from PT-specific logistic regression models on PEH identification, HMDB 2015 to 2020

| Province/ Territory | Period                       | AOR   | Lower 95 | Upper 95 | P value |
|---------------------|------------------------------|-------|----------|----------|---------|
| Alberta             | Pre-Mandate                  | ref   | ref      | ref      | ref     |
|                     | Post-Mandate (at Quarter 17) | 3.074 | 2.771    | 3.409    | <0.0001 |
|                     | Pandemic (at Quarter 21)     | 4.806 | 4.157    | 5.557    | <0.0001 |
| Atlantic Canada     | Pre-Mandate                  | ref   | ref      | ref      | ref     |
|                     | Post-Mandate (at Quarter 17) | 3.275 | 2.512    | 4.271    | <0.0001 |
|                     | Pandemic (at Quarter 21)     | 6.618 | 4.571    | 9.58     | <0.0001 |
| British Columbia    | Pre-Mandate                  | ref   | ref      | ref      | ref     |
|                     | Post-Mandate (at Quarter 17) | 0.876 | 0.831    | 0.923    | 0.0104  |
|                     | Pandemic (at Quarter 21)     | 0.851 | 0.785    | 0.922    | <0.0001 |
| Manitoba            | Pre-Mandate                  | ref   | ref      | ref      | ref     |
|                     | Post-Mandate (at Quarter 17) | 1.396 | 1.138    | 1.712    | 0.1543  |
|                     | Pandemic (at Quarter 21)     | 1.33  | 0.991    | 1.786    | 0.7932  |
| Ontario             | Pre-Mandate                  | ref   | ref      | ref      | ref     |
|                     | Post-Mandate (at Quarter 17) | 4.293 | 3.717    | 4.96     | <0.0001 |
|                     | Pandemic (at Quarter 21)     | 5.962 | 4.876    | 7.291    | <0.0001 |
| Quebec              | Pre-Mandate                  | ref   | ref      | ref      | ref     |
|                     | Post-Mandate (at Quarter 17) | 1.513 | 1.347    | 1.7      | 0.0045  |
|                     | Pandemic (at Quarter 21)     | 1.814 | 1.534    | 2.145    | <0.0001 |
| Saskatchewan        | Pre-Mandate                  | ref   | ref      | ref      | ref     |
|                     | Post-Mandate (at Quarter 17) | 2.532 | 1.886    | 3.399    | 0.5314  |
|                     | Pandemic (at Quarter 21)     | 3.081 | 2.028    | 4.681    | 0.7369  |
| Territories         | Pre-Mandate                  | ref   | ref      | ref      | ref     |
|                     | Post-Mandate (at Quarter 17) | 1.856 | 1.157    | 2.976    | 0.632   |
|                     | Pandemic (at Quarter 21)     | 2.644 | 1.369    | 5.107    | 0.2862  |

Source: Hospital Morbidity Database (HMDB), 2015–2016 to 2020–2021, Canadian Institute for Health Information.

Notes: Primary logistic regression model adjusted for period, fiscal quarter, and their interaction effect  
 Each province/territory specific logistic regression model adjusted for period, quarters, and their interaction effect  
 PEH - People experiencing homelessness

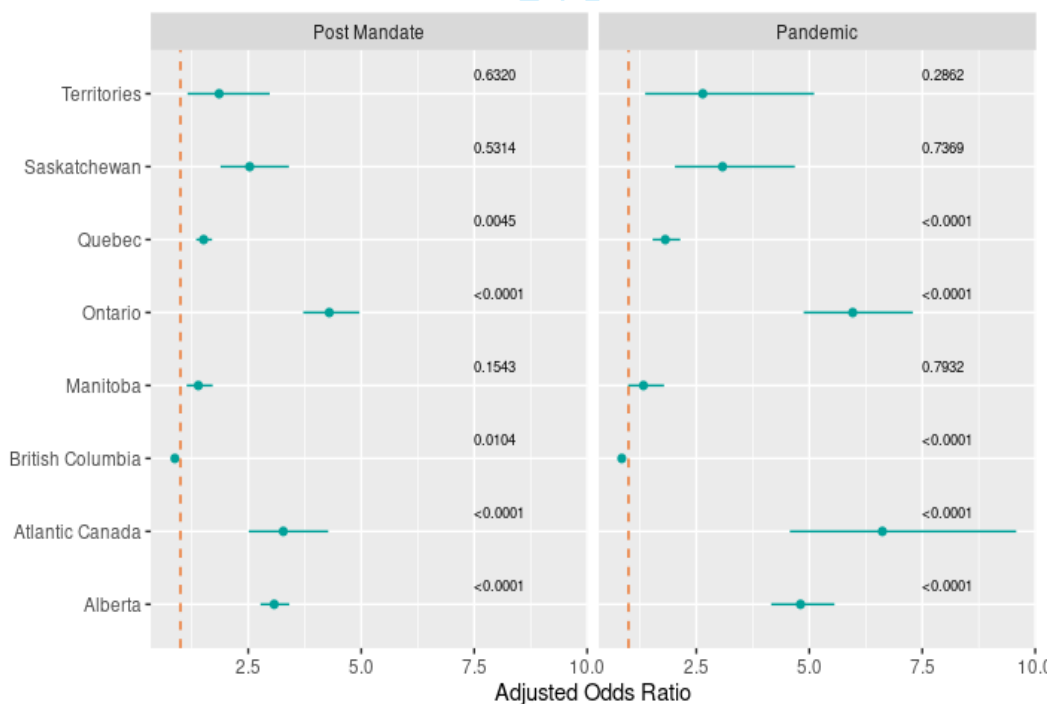

Supplement: open-2023-0044-original-submission.pdf [file open-2023-0044-original-submission.pdf]
